# Supplementary material for: Maraviroc Intensification Improves Endothelial Function in Abacavir-Treated Patients, an Open-Label Randomized Cross-Over Pilot Study
Source: Springer Nature journal article supplement (doi:10.1007/s40121-016-0115-0), 2016-06-14
Supplement: MOESM1 [file 10264842]

**Supplementary Table 1**. **Staining protocol for flowcytometry in the MASTER study.**

|  | | | | | | | | | | |
| --- | --- | --- | --- | --- | --- | --- | --- | --- | --- | --- |
| **Staining** | **T cell activation** | | | | **HIV-co receptors** | | **Apoptosis** | | **Monocytes** | |
|  | **MoAbs** | **MF** | **MoAbs** | **MF** | **MoAbs** | **MF** | **MoAbs** | **MF** | **MoAbs** | **MF** |
|  | CD3 PcB | eB | CD3 PcB | eB | CD3 PcB | eB | CD3 PcB | eB | CD14 PerCp-Cy5.5 | BL |
|  | CD4 APC-Cy7 | eB | CD4 APC-Cy7 | eB | CD4 APC-Cy7 | eB | CD4 APC-Cy7 | eB | CD40 APC | BL |
|  | CD27 APC | BD | CD8 PerCp | BD | CD8 PerCp | BD | CD8 FITC | BD | CD169 PE | Ab |
|  | CD45RO PE-Cy7 | BD | CD27 APC | BD | CD27 APC | BD | CD27 APC | BD |  |  |
|  | CD38 PerCp-Cy5.5 | BL | CD95 PE | BD | CCR5 FITC | BD | Annexine PE | BD |  |  |
|  | HLA-DR FITC | BD |  |  | CXCR4 PE | BD | ADD PerCp Cy5.5 | BD |  |  |
| MoAbs Monoclonal Antibodies MF = manufacturer, eB = eBiosciences (San Diego, U.S.A.), BD BD Biosciences (Franklin Lakes, U.S.A.) BL BioLegend (San Diego, U.S.A.) Ab AbD Serotec (Kidlington, U.K.) | | | | | | | | | | |
| The monoclonal antibodies, their flour chromes and the manufacturer. | | | | | | | | | | |
